# Supplementary material
Source: MDPI journal article supplement (https://www.mdpi.com/2073-4441/9/12/951)
Supplement: s1 [file s1]

**Table S1.** Prosome length (L.), prosome width (W), dry mass (DM) and standard respiration rates (SRR) of juveniles of *Diacyclops belgicus* measured in three different trials and temperatures. Standard deviations (SD), acclimation duration and details of the experimental protocols are provided too.

| <b>Metrics and Protocol Details</b>   | <b>14 °C</b>     | <b>15 °C</b>            | <b>17 °C</b>     |
|---------------------------------------|------------------|-------------------------|------------------|
| L (mm) ± SD                           | 0.2688 ± 0.02978 | 0.2122 ± 0.1361         | 0.2601 ± 0.0198  |
| W (mm) ± SD                           | 0.1026 ± 0.0193  | 0.1219 ± 0.0220         | 0.1062 ± 0.0135  |
| DM (mg) ± SD                          | 0.0005 ± 0.0003  | 0.0010 ± 0.0010         | 0.0005 ± 0.0001  |
| SRR (µg O <sub>2</sub> /ind. ×h) ± SD | 0.0089 ± 0.0043  | 0.0034 ± 0.0013         | 0.0067 ± 0.0060  |
| Acclimation duration (days)           | 7                | 3                       | 7                |
| Measurements                          | Individual-based | Pool-based (30–35 juv.) | Individual-based |
| Number of replicates                  | 20               | 4                       | 20               |
| Reference                             | This study       | [26]                    | This study       |
